# Supplementary material for: Parent-Child Interaction Therapy from the Parents’ Perspective
Source: Springer Nature journal article supplement (doi:10.1007/s10826-019-01611-5), 2019-10-09
Supplement: MOESM1 [file 17256978]

**Parent-Child Interaction Therapy from the Parents’ Perspective (Woodfield & Cartwright, 20..)**

**Appendix A: Interview Schedule**

Preamble

*I’m interested in hearing about your experiences of Parent-Child Interaction Therapy at the* ***[agency]****. I have a little bit of information that tells me you saw* ***[clinician name/s]*** *in* ***[month/year]*** *when* ***[child’s name]*** *was* ***[age]*** *– is that about right?*

*Today I’ll be asking you to think about your time in the Parent-Child Interaction Therapy (PCIT) programme, rather than your overall* ***[agency]*** *experience. Just as a reminder, PCIT uses the one-way mirror and the ear piece / head set, and clinicians coach you through the process. I’m going to ask you about whether you feel it worked, and how it was for you to go through the process.*

*I have some questions to guide our discussion, but please feel free to talk about things I haven’t asked about, or other things that come to mind. Today I’ll ask you to speak generally about how things were for you, but I’ll also ask whether you can think of some specific examples that will help give me a clearer picture of how things were for you. Do you have any questions?*

**Effectiveness**

1. What were your child’s difficulties, or the behaviours you wanted PCIT to help with?
2. First I want to ask about the time immediately after PCIT, and soon I’ll ask you about more recent times. How were things immediately after PCIT?
3. What differences, if any, did PCIT make for your child?
4. What differences, if any, did PCIT make for you?
5. What differences, if any, did it make to your relationship with your child?
6. Were you satisfied with the changes? *[And/or]* Did PCIT achieve your goals / bring about the changes you hoped it would? How satisfied were you, on a scale from 1 to 5, where 1 is not very satisfied and 5 is very satisfied indeed?
7. And now, thinking about how things are at the moment – have there been on-going benefits?
8. If so, how has this come about – what do you put it down to?
   1. (If not, can you tell me about how things have changed? What do you make of this?)
9. Just out of interest, have you continued with the special play time?

**Acceptability**

1. Tell me about your experience of PCIT - what was it like for you?
2. What do you remember most?
3. What was the CDI (Child Directed Interaction) or relationship building part like for you*? [If required: CDI was the first part, the part where you learned and used the PRIDE skills, and let your child lead the play]* – what did you like / not like?
4. What was the PDI (Parent Directed Interaction) or ‘discipline’ part like for you? [*If required: PDI was the second part, where you learned and used effective commands, and the time out process]* – what did you like / not like?
5. What was it like being “coached”?
   1. Can you remember a specific time when the coaching was really useful or you really liked it?
   2. Can you remember a time when you didn’t like the coaching, or it was hard?

**Broader context**

1. How would you say that PCIT aligned with your family values, be they cultural, spiritual or otherwise?
2. How did PCIT compare to other programmes you may have done, such as The Incredible Years, Triple P, Circle of Security, Wait Watch and Wonder, or Toolbox?

- Did PCIT feel different, for you as a parent? What made it different?

1. Many parents in New Zealand have experienced depression, anxiety, or another mental health issue. I’m not sure if this is the case for you - and you don’t need to tell me - but I wonder if you would recommend PCIT for parents who have a mental health issue such as depression or anxiety? (If so, why? If not, why)

- Would you suggest PCIT is more appropriate than a group programme in this situation?

1. PCIT is usually delivered by one clinician. What was it like having two clinicians – did this add anything to the experience for you? Were there any disadvantages?
2. *[Fathers only]* As a Dad, how was the programme for you? Would you recommend it to other Fathers?
3. Overall, would you recommend PCIT to other parents?

Any other feedback or comments?

Prompts

What did that mean to you?

How did that affect you? What was that like for you?

Can you give an example? Can you think of a time when that happened, so I can understand more about it?

What makes you say that?

Be silent and wait for elaboration.

Pick up on words, gestures or phrases which seem significant, and ask about these.
